# Supplementary material for: Extending Theoretical Understanding for Defining the Capabilities of Big Data Analytics in Organisations: a Thematic Analysis
Source: Research Square preprint supplement (doi:10.21203/rs.3.rs-694446/v1), 2021-07-09
Supplement: Supplementary file 1 [file fc0dcdf8c23997273cae1590.docx]

| Authors Details (year) | Article details |
| --- | --- |
| Rialti R, Marzi G, Silic M, Ciappei C. (2018) | Ambidextrous organization and agility in big data era. |
| Amakoh KO, Faustino BA, Oloruntoba FA, Ogwezzy-Ndisika AO. (2018) | BD and accountability in Nigeria. INSIGHTS FROM THE BUDGIT ORGANIZATION AND THE #OPENNASS CAMPAIGN. |
| Moore P. (2016) | Big Data and structural organisation in major arts bodies: an evolving ethnographic method. |
| Heeks R, Rakesh V, Sengupta R, Chattapadhyay S, Foster C. (2020) | Datafication, value and power in developing countries: Big data in two Indian public service organizations. |
| Päivikki Kuoppakangas TK, Jari Stenvall,, Ilpo Laitinen O-PR, Pasi-Heikki Rannisto. (2019) | Examining the core dilemmas Hindering Big Data-related Transformations in Public-Sector Organisations. |
| Batistič S, der Laken P. (2019) | History, Evolution and Future of Big Data and Analytics: A Bibliometric Analysis of Its Relationship to Performance in Organizations. |
| Chen X, Zhang X. (2016) | How Environmental Uncertainty Moderates the Effect of Relative Advantage and Perceived Credibility on the Adoption of Mobile Health Services by Chinese Organizations in the Big Data Era. |
| Wang Y, Kung L, Gupta S, Ozdemir S. (2019) | Leveraging Big Data Analytics to Improve Quality of Care in Healthcare Organizations: A Configurational Perspective. |
| Ma F, Chen Y, Zhao Y. (2017) | Research on the organization of user needs information in the big data environment. |
| Westermann A, Forthmann J. (2020) | Social listening: a potential game changer in reputation management How big data analysis can contribute to understanding stakeholders' views on organisations. |

Appendix A: Web of Science -10

Springer Link - 9

| Author details (year) | Article details |
| --- | --- |
| Anfer O, Wamba SF. (2019) | Big Data Analytics and Strategic Marketing Capabilities: Impact on Firm Performance. |
| Mikalef P, Krogstie J. (2018) | Big Data Analytics as an Enabler of Process Innovation Capabilities: A Configurational Approach. |
| Mikalef P, Pappas IO, Krogstie J, Giannakos M. (2017) | Big data analytics capabilities: a systematic literature review and research agenda. |
| Fosso Wamba S, Akter S. (2015) | Big Data Analytics for Supply Chain Management: A Literature Review and Research Agenda. |
| Akter S, Wamba SF. (2016) | Big data analytics in E-commerce: a systematic review and agenda for future research. |
| Obitade PO. (2019) | Big data analytics: a link between knowledge management capabilities and superior cyber protection. |
| Akter S, Wamba SF. (2017) | Big data and disaster management: a systematic review and agenda for future research. |
| Liu C-H, Mehandjiev N. (2020) | The Effect of Big Data Analytics Capability on Firm Performance: A Pilot Study in China |
| Liu P, Yi S-p. (2017) | A study on supply chain investment decision-making and coordination in the Big Data environment. |

Science Direct - 34

| Author details (year) | Article details |
| --- | --- |
| Gupta S, Drave VA, Dwivedi YK, Baabdullah AM, Ismagilova E. (2020) | Achieving superior organizational performance via big data predictive analytics: A dynamic capability view. |
| Adiska Fardani Haryadi JH, Agung Wahyudi , Haiko van der Voort, and Marijn Janssen (2016) | Antecedents of BD quality. An Empirical Examination in Financial Service Organizations. |
| George JP, Sagar Chandra K. (2021) | Asset Productivity in Organisations at the Intersection of Big Data Analytics and Supply Chain Management. |
| Dubey R, Gunasekaran A, Childe SJ, Roubaud D, Fosso Wamba S, Giannakis M, et al. (2019) | Big data analytics and organizational culture as complements to swift trust and collaborative performance in the humanitarian supply chain. |
| Lozada N, Arias-Perez J, Perdomo-Charry G. (2019) | Big data analytics capability and co-innovation: An empirical study. |
| Awan U, Shamim S, Khan Z, Zia NU, Shariq SM, Khan MN. (2021) | Big data analytics capability and decision-making: The role of data-driven insight on circular economy performance. |
| Ranjan J, Foropon C. (2021) | Big Data Analytics in Building the Competitive Intelligence of Organizations. |
| Galetsi P, Katsaliaki K, Kumar S. (2020) | Big data analytics in health sector: Theoretical framework, techniques and prospects. |
| Wang G, Gunasekaran A, Ngai EWT, Papadopoulos T. (2016) | Big data analytics in logistics and supply chain management: Certain investigations for research and applications. |
| Miah SJ, Vu HQ, Gammack J, McGrath M. (2017) | A Big Data Analytics Method for Tourist Behaviour Analysis. |
| Wang Y, Kung L, Byrd TA. (2018) | Big data analytics: Understanding its capabilities and potential benefits for healthcare organizations. |
| Li J, Xu L, Tang L, Wang S, Li L. (2018) | Big data in tourism research: A literature review. |
| Mikalef P, van de Wetering R, Krogstie J. (2020) | Building dynamic capabilities by leveraging big data analytics: The role of organizational inertia. |
| Marashi PS, Hamidi H. (2018) | Business Challenges of Big Data Application in Health Organization. |
| Zaman I, Pazouki K, Norman R, Younessi S, Coleman S. (2017) | Challenges and Opportunities of Big Data Analytics for Upcoming Regulations and Future Transformation of the Shipping Industry. |
| Sousa MJ, Pesqueira AM, Lemos C, Sousa M, Rocha A. (2019) | Decision-Making based on Big Data Analytics for People Management in Healthcare Organizations. |
| Du G, Zhang X, Ni S. (2019) | Discussion on the Application of Big Data in Rail Transit Organization. |
| Alkatheeri Y, Ameen A, Isaac O, Nusari M, Duraisamy B, Khalifa GSA. (2020) | The Effect of Big Data on the Quality of Decision-Making in Abu Dhabi Government Organisations. |
| Kristoffersen E, Mikalef P, Blomsma F, Li J. (2021) | The effects of business analytics capability on circular economy implementation, resource orchestration capability, and firm performance. |
| Wang Y, Hajli N. (2017) | Exploring the path to big data analytics success in healthcare. |
| Mikalef P, Krogstie J, Pappas IO, Pavlou P. (2020) | Exploring the relationship between big data analytics capability and competitive performance: The mediating roles of dynamic and operational capabilities. |
| Ngo J, Hwang B-G, Zhang C. (2020) | Factor-based big data and predictive analytics capability assessment tool for the construction industry. |
| Nicolaescu SS, Florea A, Kifor CV, Fiore U, Cocan N, Receu I, et al. (2020) | Human capital evaluation in knowledge-based organizations based on big data analytics. |
| De Mauro A, Greco M, Grimaldi M, Ritala P. (2018) | In (Big) Data we trust: Value creation in knowledge organizations - Introduction to the special issue. |
| Upadhyay P, Kumar A. (2020) | The intermediating role of organizational culture and internal analytical knowledge between the capability of big data analytics and a firm’s performance. |
| Jha AK, Agi MAN, Ngai EWT. (2020) | A note on big data analytics capability development in supply chain. |
| Wamba SF, Dubey R, Gunasekaran A, Akter S. (2020) | The performance effects of big data analytics and supply chain ambidexterity: The moderating effect of environmental dynamism. |
| Liao X, Liu X, Feng F. (2019) | Promoting the Leadership of Grass-roots Party Organizations in the Strategy of Rural Revitalization in the Big Data Era. |
| Wahyudi A, Farhani A, Janssen M. (2018) | Relating Big Data and Data Quality in Financial Service Organizations. |
| Yu W, Zhao G, Liu Q, Song Y. (2021) | Role of big data analytics capability in developing integrated hospital supply chains and operational flexibility: An organizational information processing theory perspective. |
| Sivarajah U, Irani Z, Gupta S, Mahroof K. (2020) | Role of big data and social media analytics for business to business sustainability: A participatory web context. |
| Anandasivakumar Ekambarama AØS, Heidi Bull-Berga, Nils O.E. Olsson. (2018) | The role of big data and knowledge management in improving projects and project-based organizations |
| Gupta M, George JF. (2016) | Toward the development of a big data analytics capability. |
| Kristoffersen E, Mikalef P, Blomsma F, Li J. (2021) | Towards a business analytics capability for the circular economy. |

IEEE - 17

| Author detail (year) | Article details |
| --- | --- |
| Maninder Jeet Kaur VPM. (2018) | Analysis of Big Data Cloud Computing Environment on Healthcare Organizations by implementing Hadoop Clusters. |
| Madhlangobe W, Wang L. (2018) | Assessment of Factors Influencing Intent-to-Use Big Data Analytics in an Organization: Pilot Study. |
| Joan Mneney J-PVB. (2016) | Big Data Capabilities and Readiness of South African Retail Organisations. |
| Pwint Phyu Khine WZS. (2017) | Big data in Government Organizations: A review. |
| A.Budin Posavec SK. (2016) | Challenges in adopting big data strategies and plans in organizations. |
| George Papageorgiou CP, Athanasios Maimaris. (2018) | Developing a Smart Pedestrian Network Big Data Platform for Municipal Organizations. |
| Xianghua Z. (2020) | The Development of Social organization Standards in China under Big Data and Comparative Study with International Counterparts. |
| He X, Liu P. (2017) | Empirical Study on the Construction of a Unified Information System with Big Data Analysis: A Case of Social Work Organizations and Civil Affairs Departments. |
| Vanauer M, Bohle C, Hellingrath B. (2015) | Guiding the Introduction of Big Data in Organizations: A Methodology with Business- and Data-Driven Ideation and Enterprise Architecture Management-Based Implementation. |
| Domagala P. (2019) | Internet of Things and Big Data technologies as an opportunity for organizations based on Knowledge Management. |
| Mohamad Taha Ijab SMAW, Mohd Azul Mohamad Salleh, Azlina Abu Bakar. (2019) | Investigating Big Data Analytics Readiness in Higher Education Using the Technology-Organisation-Environment -TOE- Framework. |
| Zan KK. (2019) | Prospects For Using Big Data To Improve The Effectiveness Of An Education Organization. |
| Zihan Lin DS, Zhanfeng Li, Min Tang. (2017) | Research on the dynamic change of terrorist organization cooperation from the big data perspective. |
| Kun Wang DS. (2015) | Research on the Shanghai Cooperation Organization network architecture from the big data perspective. |
| Jokonya O. (2015) | Towards a Conceptual Framework for Big Data Adoption in Organizations. |
| Shuradze G, Wagner H-T. (2016) | Towards a Conceptualization of Data Analytics Capabilities. |
| Rodriguez-Ibanez M, Munoz-Romero S, Soguero-Ruiz C, Gimeno-Blanes F-J, Rojo-Alvarez JL. (2019) | Towards Organization Management Using Exploratory Screening and Big Data Tests: A Case Study of the Spanish Red Cross. |
